# Supplementary material for: Characteristics of Two Crustins from Alvinocaris longirostris in Hydrothermal Vents
Source: MDPI journal article supplement (doi:10.3390/md19110600), 2021-10-22
Supplement: s1 [file s1]

**Table S1.** Primers with restriction enzymes used for cloning

| Gene             | Forward Primer (5'-3') | Reverse Primer (5'-3')  |
|------------------|------------------------|-------------------------|
| <i>Al-crus 3</i> | TTCGCCCAACCAGGATTCGG   | TGTGCAAACCTGCCATCATATAA |
| <i>Al-crus 7</i> | ATGCAAGAAGGTGCTCAAG    | ACTTGGCTTCGGGCGTTAA     |

**Table S2.** The similarities between Al-crus 3, Al-crus 7 and WAP domain-containing protein/peptides in crustaceans

| Species      |                                  | Accession<br>no. | identity  |           |
|--------------|----------------------------------|------------------|-----------|-----------|
|              |                                  |                  | Al-crus 3 | Al-crus 7 |
| Palaemonidae | <i>Macrobrachium nipponense</i>  | QIV66989         | 63%       | 56%       |
|              |                                  | QEQ76263         | 52%       | 63%       |
|              | <i>Macrobrachium rosenbergii</i> | AFO68120         | -         | 67%       |
|              |                                  | AGF92153         | -         | 66%       |
|              |                                  | ANH22232         | -         | 60%       |
|              |                                  | ACU25385         | 59%       | 64%       |
|              | <i>Panulirus japonicus</i>       | ACU25382         | 59%       | 63%       |
|              |                                  | ACU25383         | 57%       | -         |
|              |                                  | AGU01545         | 54%       | 66%       |
|              |                                  | BBD52151         | -         | 63%       |
|              | <i>Penaeus vannamei</i>          | BBC42585         | -         | 63%       |
|              |                                  | QOL09968         | 59%       | 65%       |
|              |                                  | ROT79125         | 59%       | -         |
|              |                                  | AAL36891         | 57%       | -         |
|              |                                  | QOL09962         | 56%       | 68%       |
|              |                                  | AAL36892         | 55%       | 58%       |
|              |                                  | ROT79124         | 55%       | 56%       |
|              |                                  | AAS59735         | 55%       | -         |
|              |                                  | AAL36894         | 55%       | -         |
|              |                                  | AAL36893         | 54%       | -         |
|              |                                  | AAL36895         | 54%       | -         |
|              |                                  | AYM00403         | 52%       | -         |
|              | <i>Penaeus paulensis</i>         | QOL09958         | -         | 64%       |
|              |                                  | ABM63361         | 57%       | 58%       |
|              |                                  | ADF80918         | -         | 58%       |
|              | <i>Penaeus subtilis</i>          | ABO93323         | 55%       | 58%       |
|              | <i>Penaeus setiferus</i>         | AAL36897         | 55%       | -         |
|              | <i>Panulirus brasiliensis</i>    | ABQ96197         | 54%       | 59%       |
|              | <i>Penaeus schmitti</i>          | ABM63362         | 54%       | -         |
| Nephropidae  | <i>Neocaridina heteropoda</i>    | AYP74901         | 56%       | 58%       |
|              | <i>Homarus americanus</i>        | KAG7170693       | -         | 82%       |
